# Supplementary material for: Physiochemical and Electrochemical Properties of a Heat-Treated Electrode for All-Iron Redox Flow Batteries
Source: MDPI journal article supplement (doi:10.3390/nano14090800), 2024-05-05
Supplement: s1 [file s1]

# Physiochemical and Electrochemical Properties of a Heat-Treated Electrode for All-Iron Redox Flow Batteries

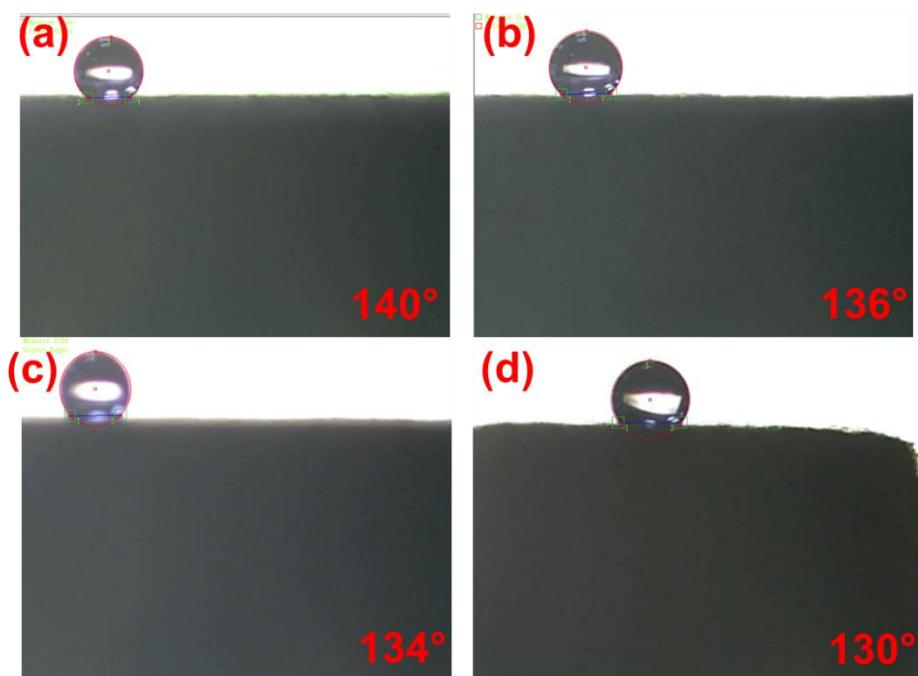

**Figure S1.** Contact angle measurements for (a) Pristine GF; (b) 400 °C GF; (c) 500 °C GF; (d) 600 °C GF.

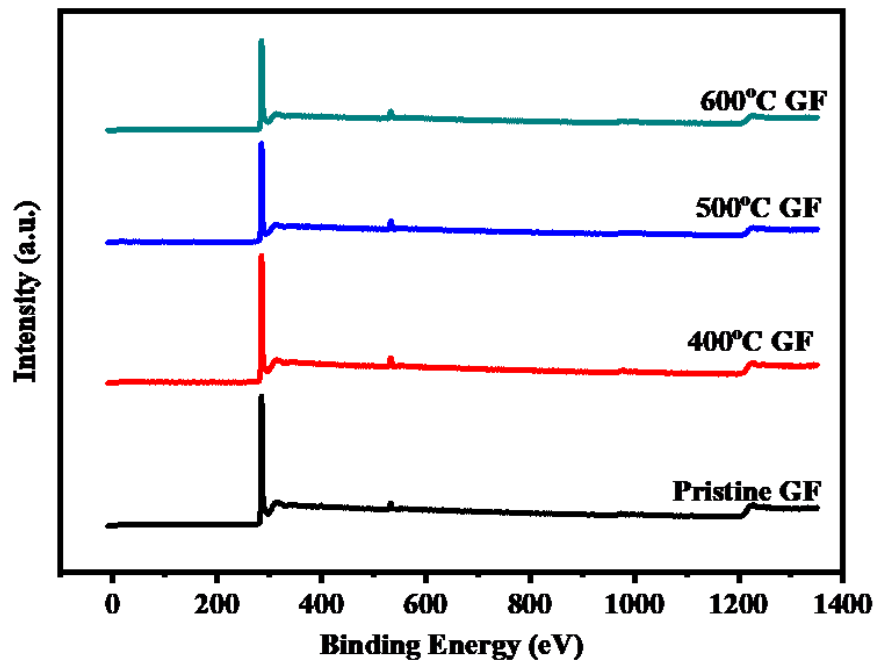

**Figure S2.** XPS spectra of pristine GF, 400 °C GF, 500 °C GF, 600 °C GF.

**Table S1.** Calculated specific capacitances for pristine GF, 400 °C GF, 500 °C GF, 600 °C GF at different cyclic voltammetry scan rates.

| Scan rate   | 40 mV s <sup>-1</sup> | 60 mV s <sup>-1</sup> | 80 mV s <sup>-1</sup> | 100 mV s <sup>-1</sup> |
|-------------|-----------------------|-----------------------|-----------------------|------------------------|
| Sample name |                       |                       |                       |                        |
| Pristine GF | 19.5 Fg <sup>-1</sup> | 15.1 Fg <sup>-1</sup> | 11.8 Fg <sup>-1</sup> | 5.5 Fg <sup>-1</sup>   |
| 400°C GF    | 31.5 Fg <sup>-1</sup> | 26.5 Fg <sup>-1</sup> | 16.5 Fg <sup>-1</sup> | 11.2 Fg <sup>-1</sup>  |
| 500°C GF    | 40.5 Fg <sup>-1</sup> | 30.3 Fg <sup>-1</sup> | 23.9 Fg <sup>-1</sup> | 22.3 Fg <sup>-1</sup>  |
| 600°C GF    | 52.4 Fg <sup>-1</sup> | 39.4 Fg <sup>-1</sup> | 34.8 Fg <sup>-1</sup> | 32.5 Fg <sup>-1</sup>  |
